# Supplementary material
Source: PubMed Central journal article supplement (PMC3498829)

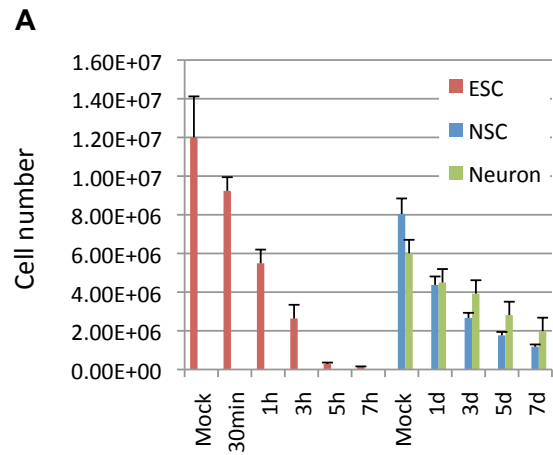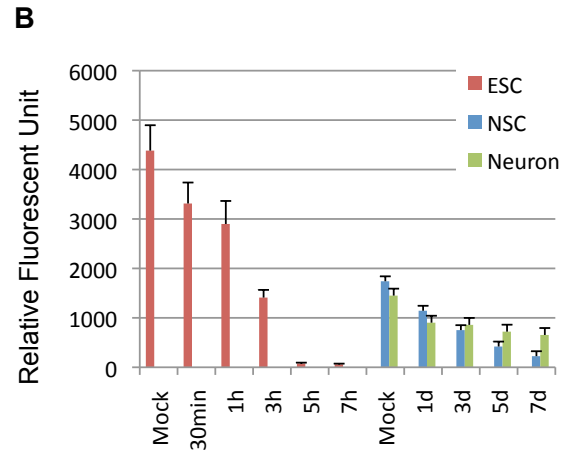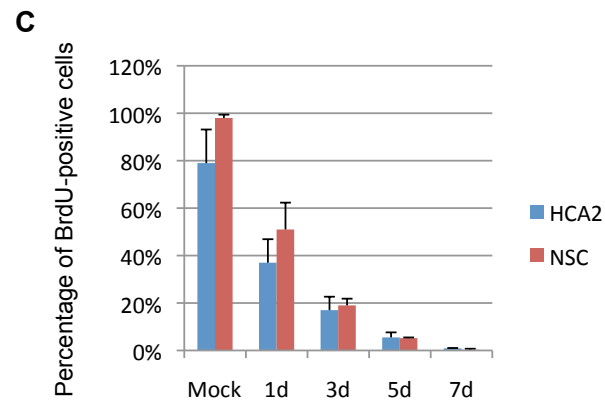

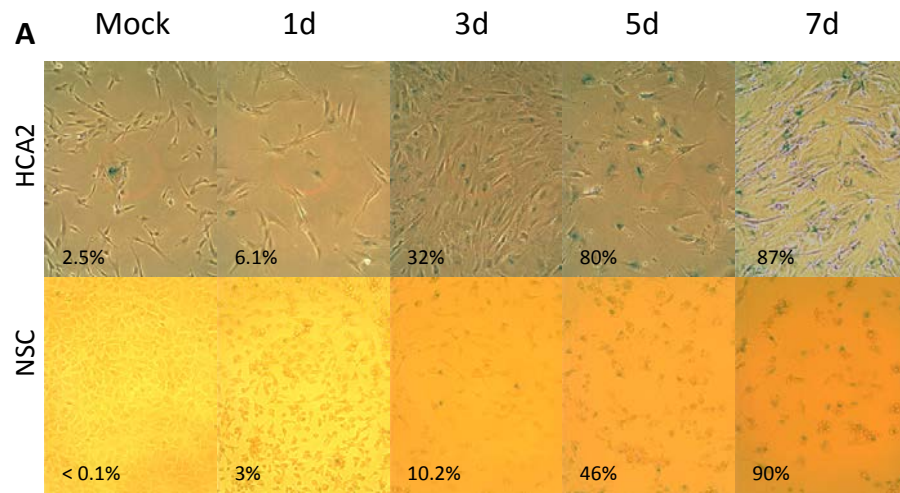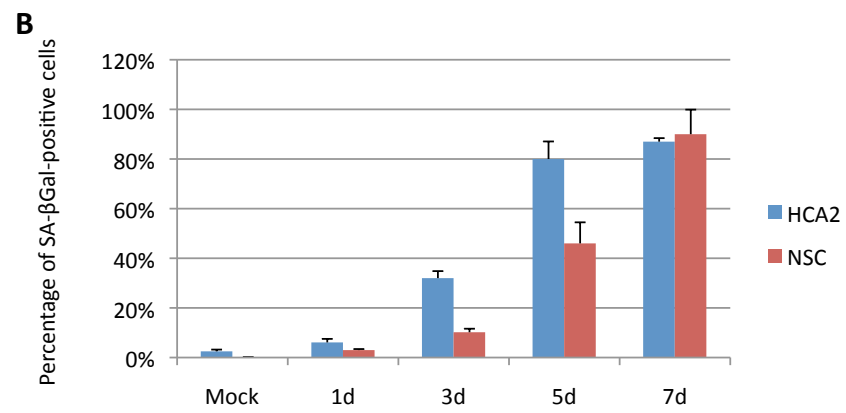

**A**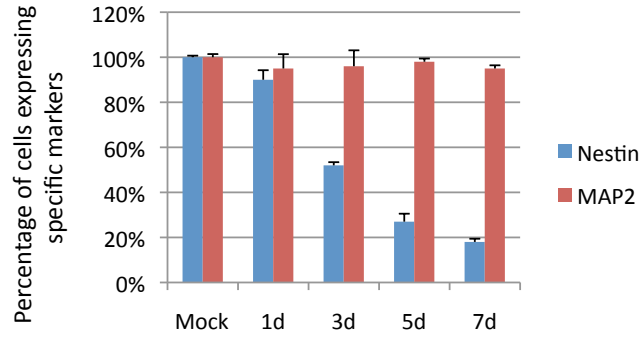**B**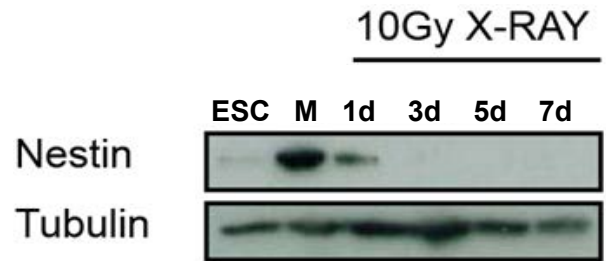**C**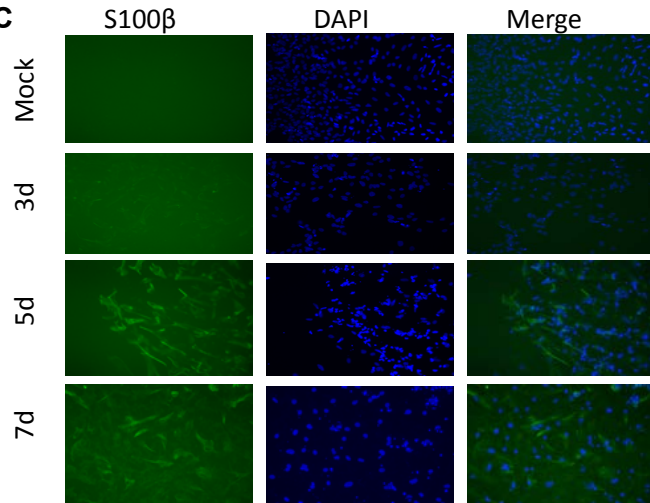**D**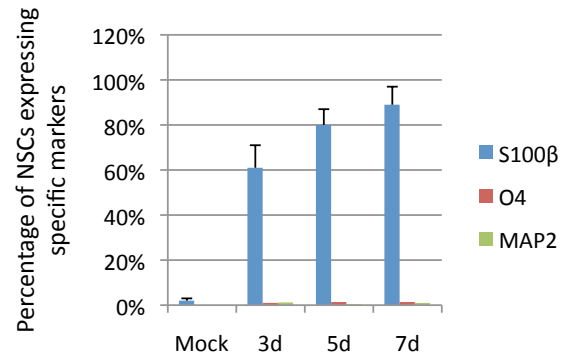

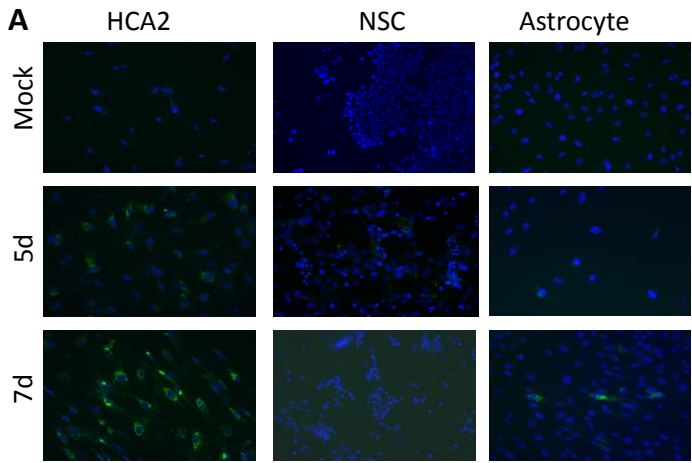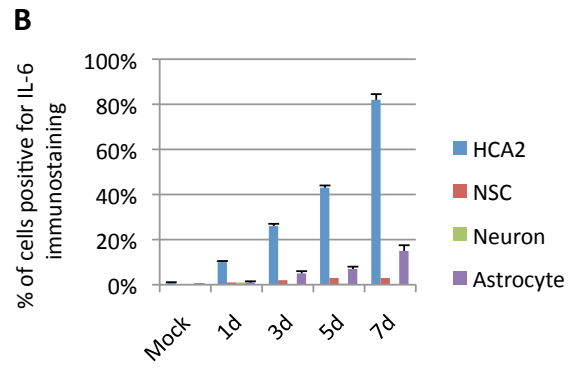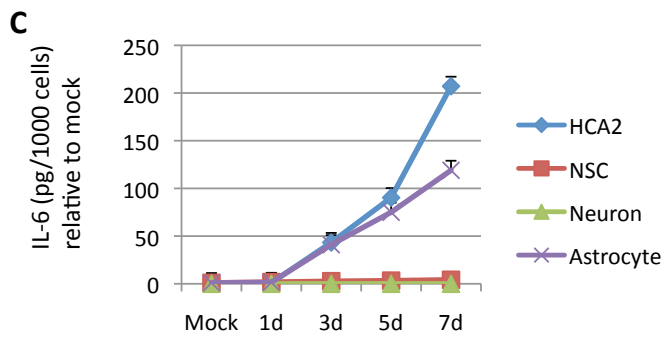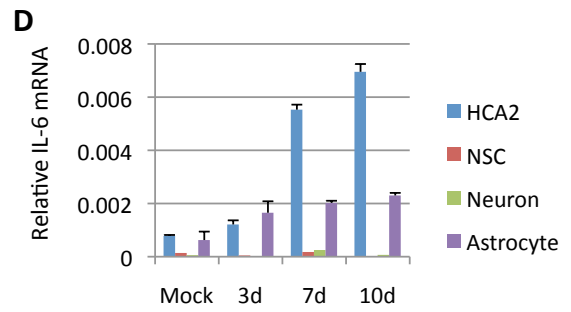

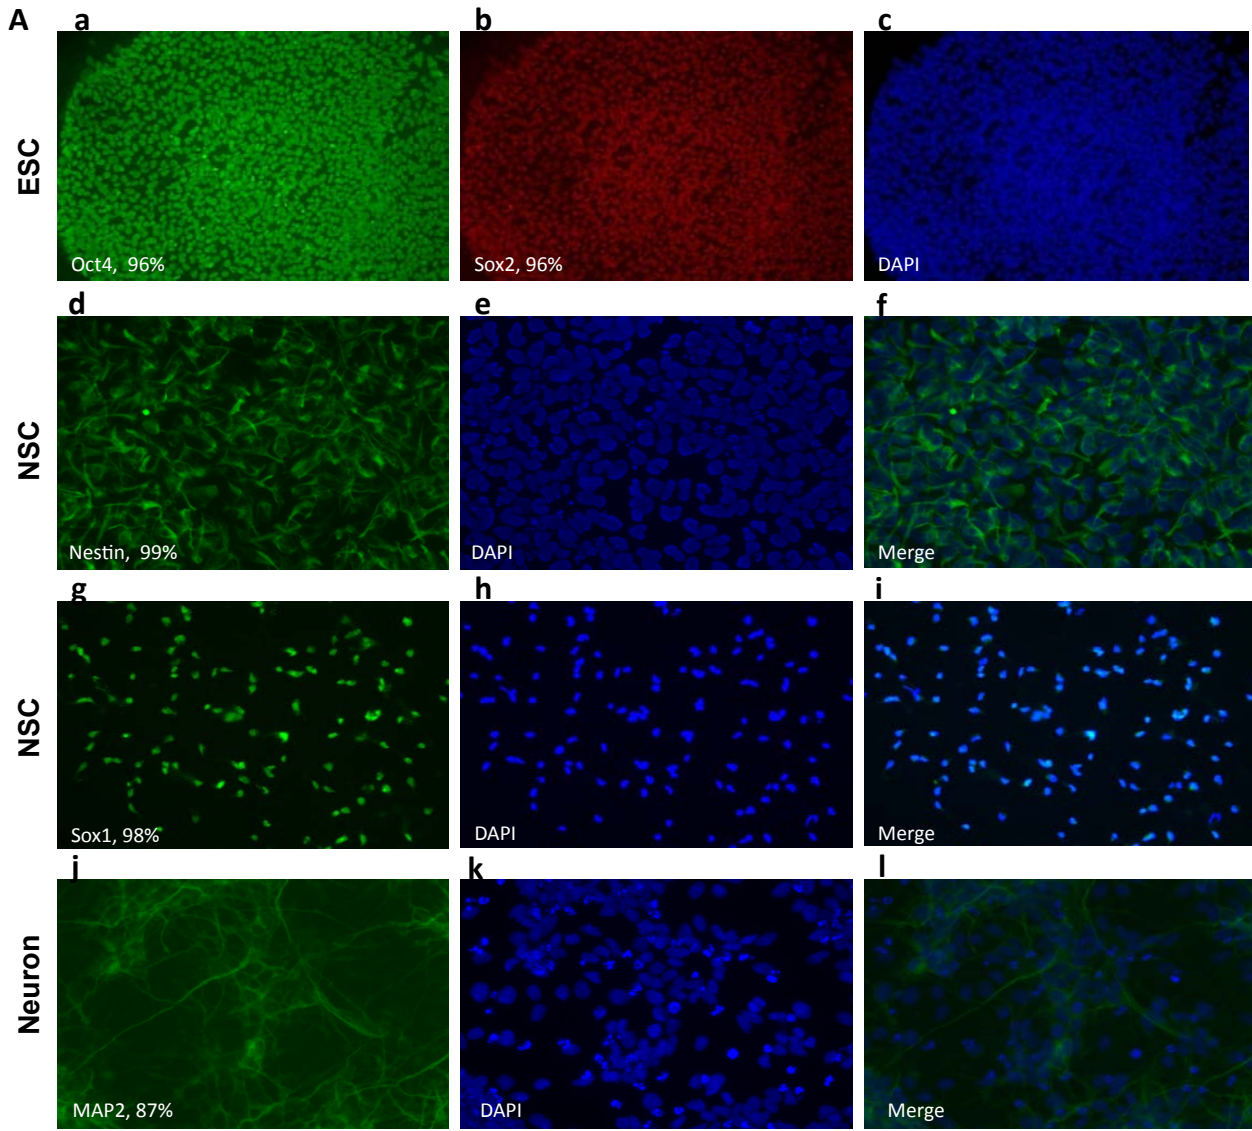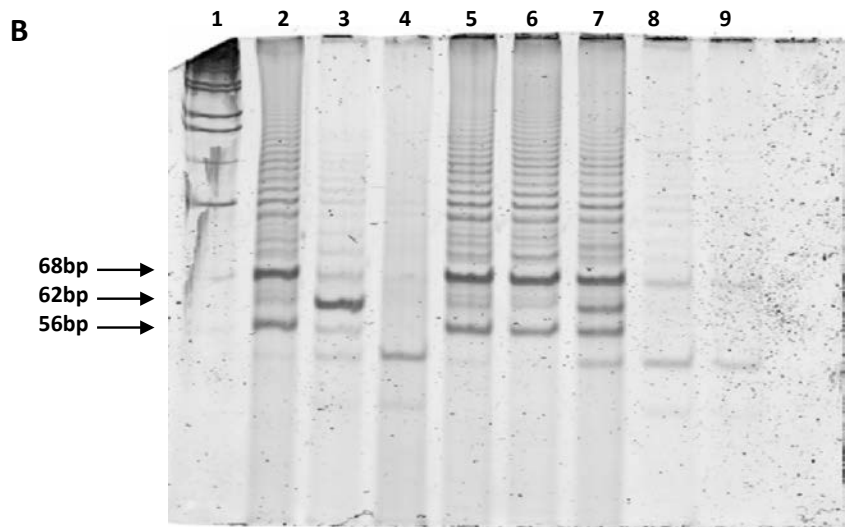

Supplementary Figure 1

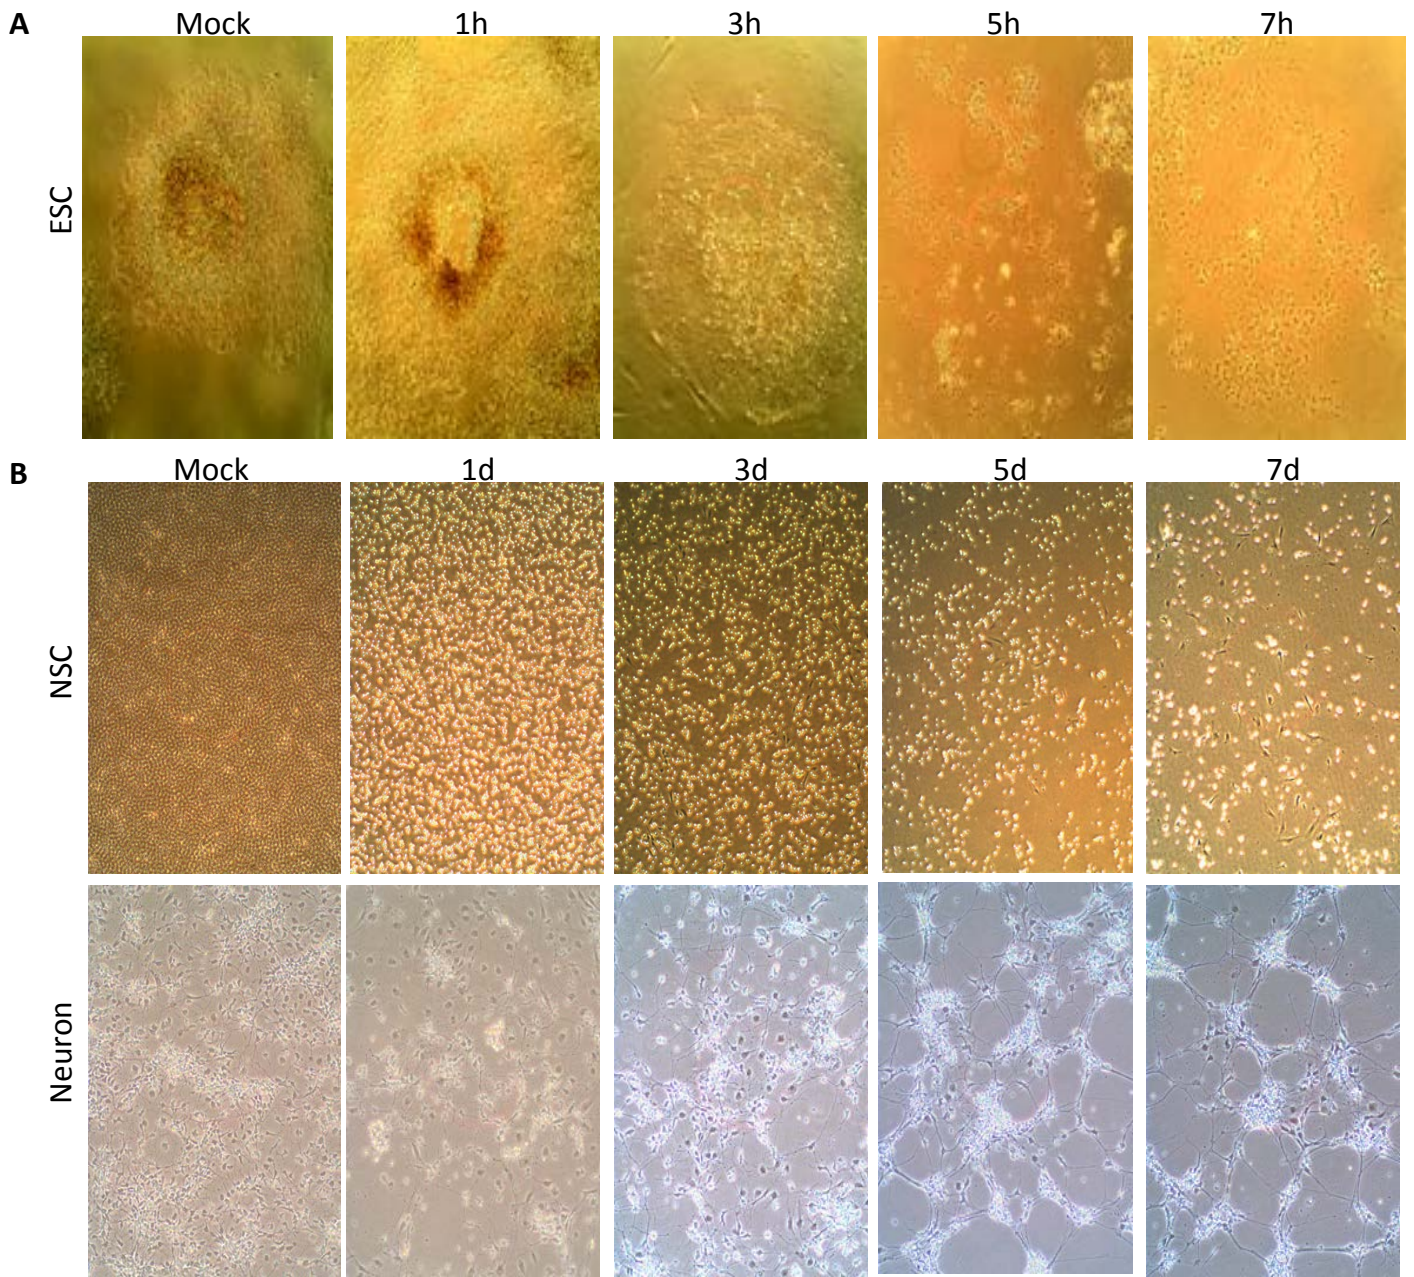

Supplementary Figure 2

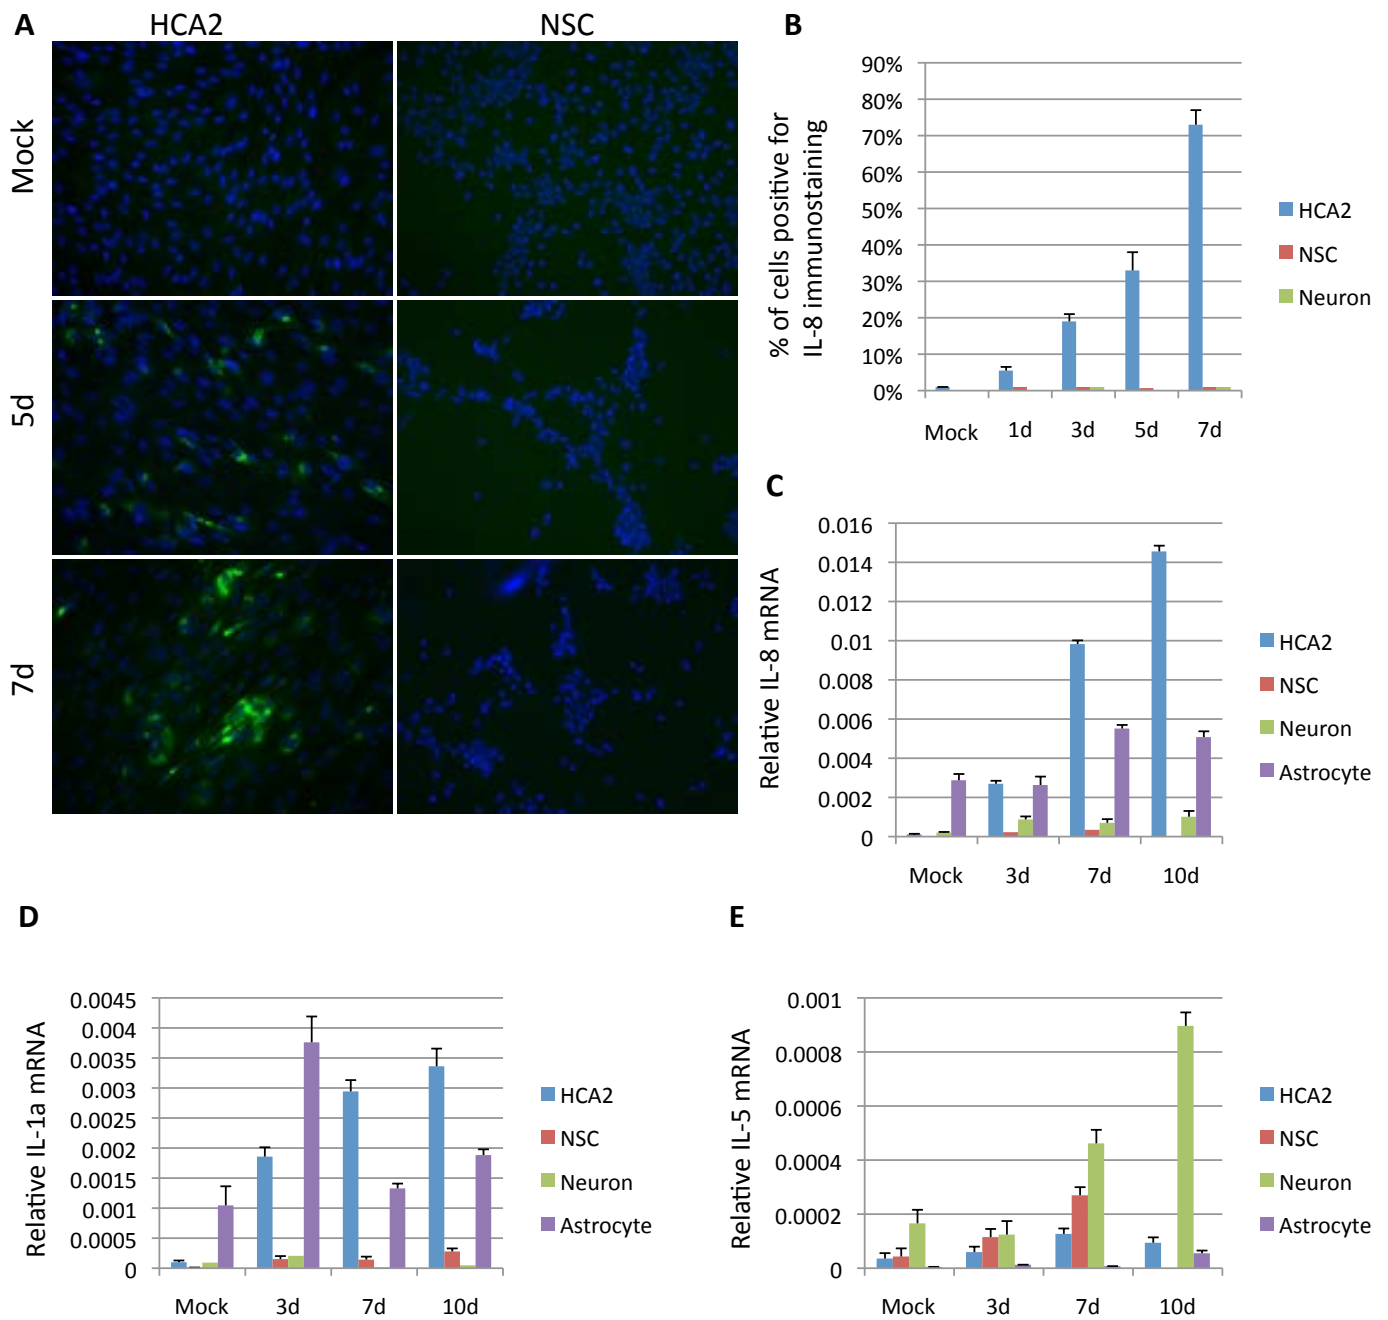

Supplementary Figure 3

Supplement: NIHMS401515-supplement-01.pdf [file NIHMS401515-supplement-01.pdf]
